# Supplementary material
Source: publisher figshare collection journal article supplement (https://karger.figshare.com/ndownloader/files/26359756)
Supplement: Supplementary file 1 [file 26359756]

| Pt ID | Cardiac anomaly | Additional anomalies | | QFPCR result | Syndrome | Gest. at testing (wks) | Outcome |
| --- | --- | --- | --- | --- | --- | --- | --- |
| CHD006 | HLHS | Holoprosencephaly, DWM, CLP | | 47,XX,+13 | Patau | 17+4 | TOP |
| CHD026 | VSD | Omphalocele, Clinodactyly | | 47,XX,+18 | Edwards | 21+3 | TOP |
| CHD028 | DORV, TOF, VSD | CDH, mediastinal shift, clenched hands, clinodactyly | | 47,XY,+18 | Edwards | 25+4 | TOP |
| CHD044 | AVSD | Short femurs, polyhydramnios | | 47,XY,+21 | Down | 26+6 | LB |
| CHD051 | AVSD | Ventriculomegaly and echogenic bowel | | 47,XY,+13 | Patau | 22+2 | TOP |
| CHD052 | AVSD | |  | 47,XX,+21 | Down | 20+4 | UK |
| CHD057 | HLHS | GI and limb defects | | 47,XX,+18 | Edwards | 20+3 | UK |
| CHD062 | VSD | Bilateral talipes | | 47,XY,+18 | Edwards | 19+6 | TOP |
| CHD065 | AVSD | Ventriculomegaly | | 47,XX,+21 | Down | 21+2 | TOP |
| | CHD067 | | --- | |  | | AVSD, overriding aorta and pulmonary stenosis | |  | | --- | |  | | | 47,XX,+21 | Down | 19 | TOP |
| CHD068 | TOF, AVSD | Bilateral talipes | | 47, XY,+21 | Down | 21+2 | UK |
| CHD071 | ECF | Brain and limb anomalies | | 69, XXX | Triploidy | 17+4 | UK |
| CHD081 | Pulmonary atresia, right aortic arch |  | | 47,XY,+21 | Down | 21+1 | TOP |
| CHD082 | Univentricular heart, TR | Omphalocele, cystic hygroma | | 47,XY,+18 | Edwards | 11+5 | TOP |
| CHD084 | AVSD, TR | Elevated NT | | 47,XX,+21 | Down | 13+1 | TOP |
| CHD097 | VSD, RVH | ACC | | 47,XX,+18 | Edwards | 21+3 | TOP |
| CHD098 | VSD | Umbilical cyst, small stomach, echogenic bowel | | 69,XXX | Triploidy | 20+5 | SB |
| CHD106 | TOF | Choroid plexus cyst, clenched hand and clinodactyly | | 47,XX,+18 | Edwards | 20+6 | TOP |
| CHD114 | HLHS | Multiple anomalies | | 47,XX,+13 | Patau | 21+1 | TOP |
| CHD116 | VSD | Elevated NT, Omphalocele | | 47,XY,+18 | Edwards | 12+5 | TOP |
| CHD123 | DORV, VSD | Head, brain, cardiac, GI, limb anomalies | | 47,XX,+18 | Edwards | 22+3 | TOP |
| CHD133 | COA | Elevated NT | | 47,XY,+21 | Down | 12+3 | TOP |
| CHD147 | TR | |  | 47,XY,+21 | Down | 13 | TOP |

Table S1 – Abnormal Quantitative Fluorescence Polymerase Chain Reaction results. [Abbreviations: ACC = Agenesis of the corpus callosum; AVSD= Atrioventricular septal defect; CLP = Cleft lip and palate; COA = Coarctation of the aorta; DORV = Double outlet right ventricle; DWM = Dandy Walker Malformation; ECF = Echogenic cardiac focus; GI = Gastrointestinal; HLHS = Hypoplastic left heart syndrome; LB = Livebirth; NT = Nuchal translucency; QFPCR = Quantitative Fluorescence Polymerase Chain Reaction; RVH = Right ventricular hypertrophy; SB=Stillbirth; TOF = tetralogy of Fallot; TOP = Termination of pregnancy; TR = Tricuspid regurgitation; UK = Unknown; VSD = Ventricular septal defect]
